# Supplementary material for: RNAsselem: a Python Package for Descriptive Analysis of RNA Secondary Structure Elements in Viral Genomes
Source: Preprints.org preprint supplement (doi:10.20944/preprints202311.1394.v1), 2023-11-22
Supplement: Supplementary file 1 [file supplementary]

## Sheet: Sheet1
Notation in manuscript	PubMed ID	Original file name	File name in collection
DENV-2	30341219	DENV2-Exvirio.ct	DENV2_30341219.ct
HCV v.1	25775547	HCV_JFH1_2a_genome_model.ct	HCV_25775547_JFH1.ct
HCV v.2	25775547	HCV_Con1b_genome_model.ct	HCV_25775547_Con1b.ct
HCV v.3	25775547	HCV_H77_1a_genome_model.ct	HCV_25775547_H77.ct
SARC-CoV-2 v.1	35236847	Vero.ct	SARS-CoV-2_35236847_Vero.ct
SARC-CoV-2 v.2	35236847	Huh7.ct	SARS-CoV-2_35236847_Huh7.ct
SARC-CoV-2 v.3	33444546	SARS-CoV-2_Full_Length_Secondary_Structure_Map.ct	SARS-CoV-2_33444546.ct
