# Supplementary material for: RNAsselem: a Python Package for Descriptive Analysis of RNA Secondary Structure Elements in Viral Genomes
Source: Preprints.org preprint supplement (doi:10.20944/preprints202311.1394.v1), 2023-11-22
Supplement: Supplementary file 2 [file supplementary]

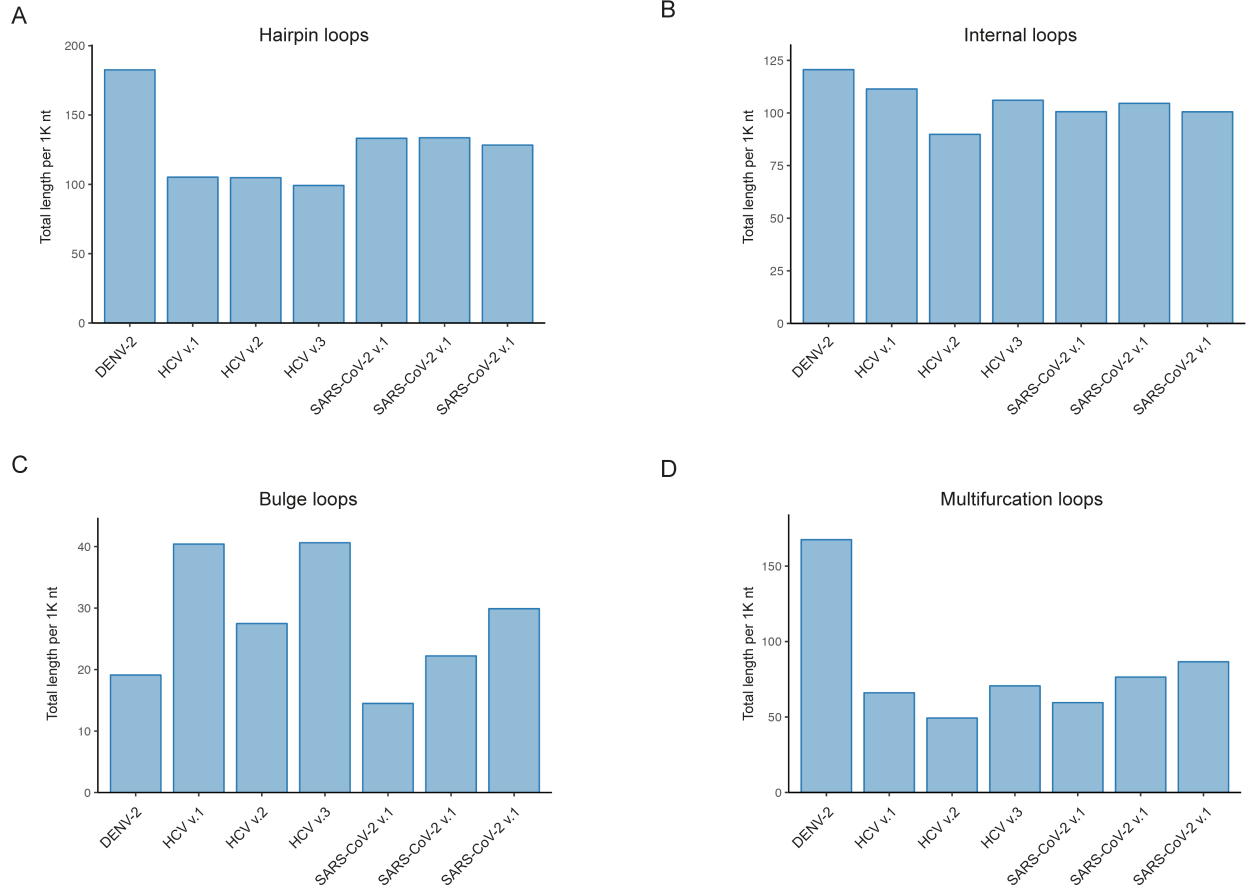

**Figure S1.** Normalized length of hairpin loops (a), internal loops (b), bulges (c), and multifurcation loops (d) in the genomes of RNA viruses.
